# Supplementary material
Source: PubMed Central journal article supplement (PMC7855744)

**A**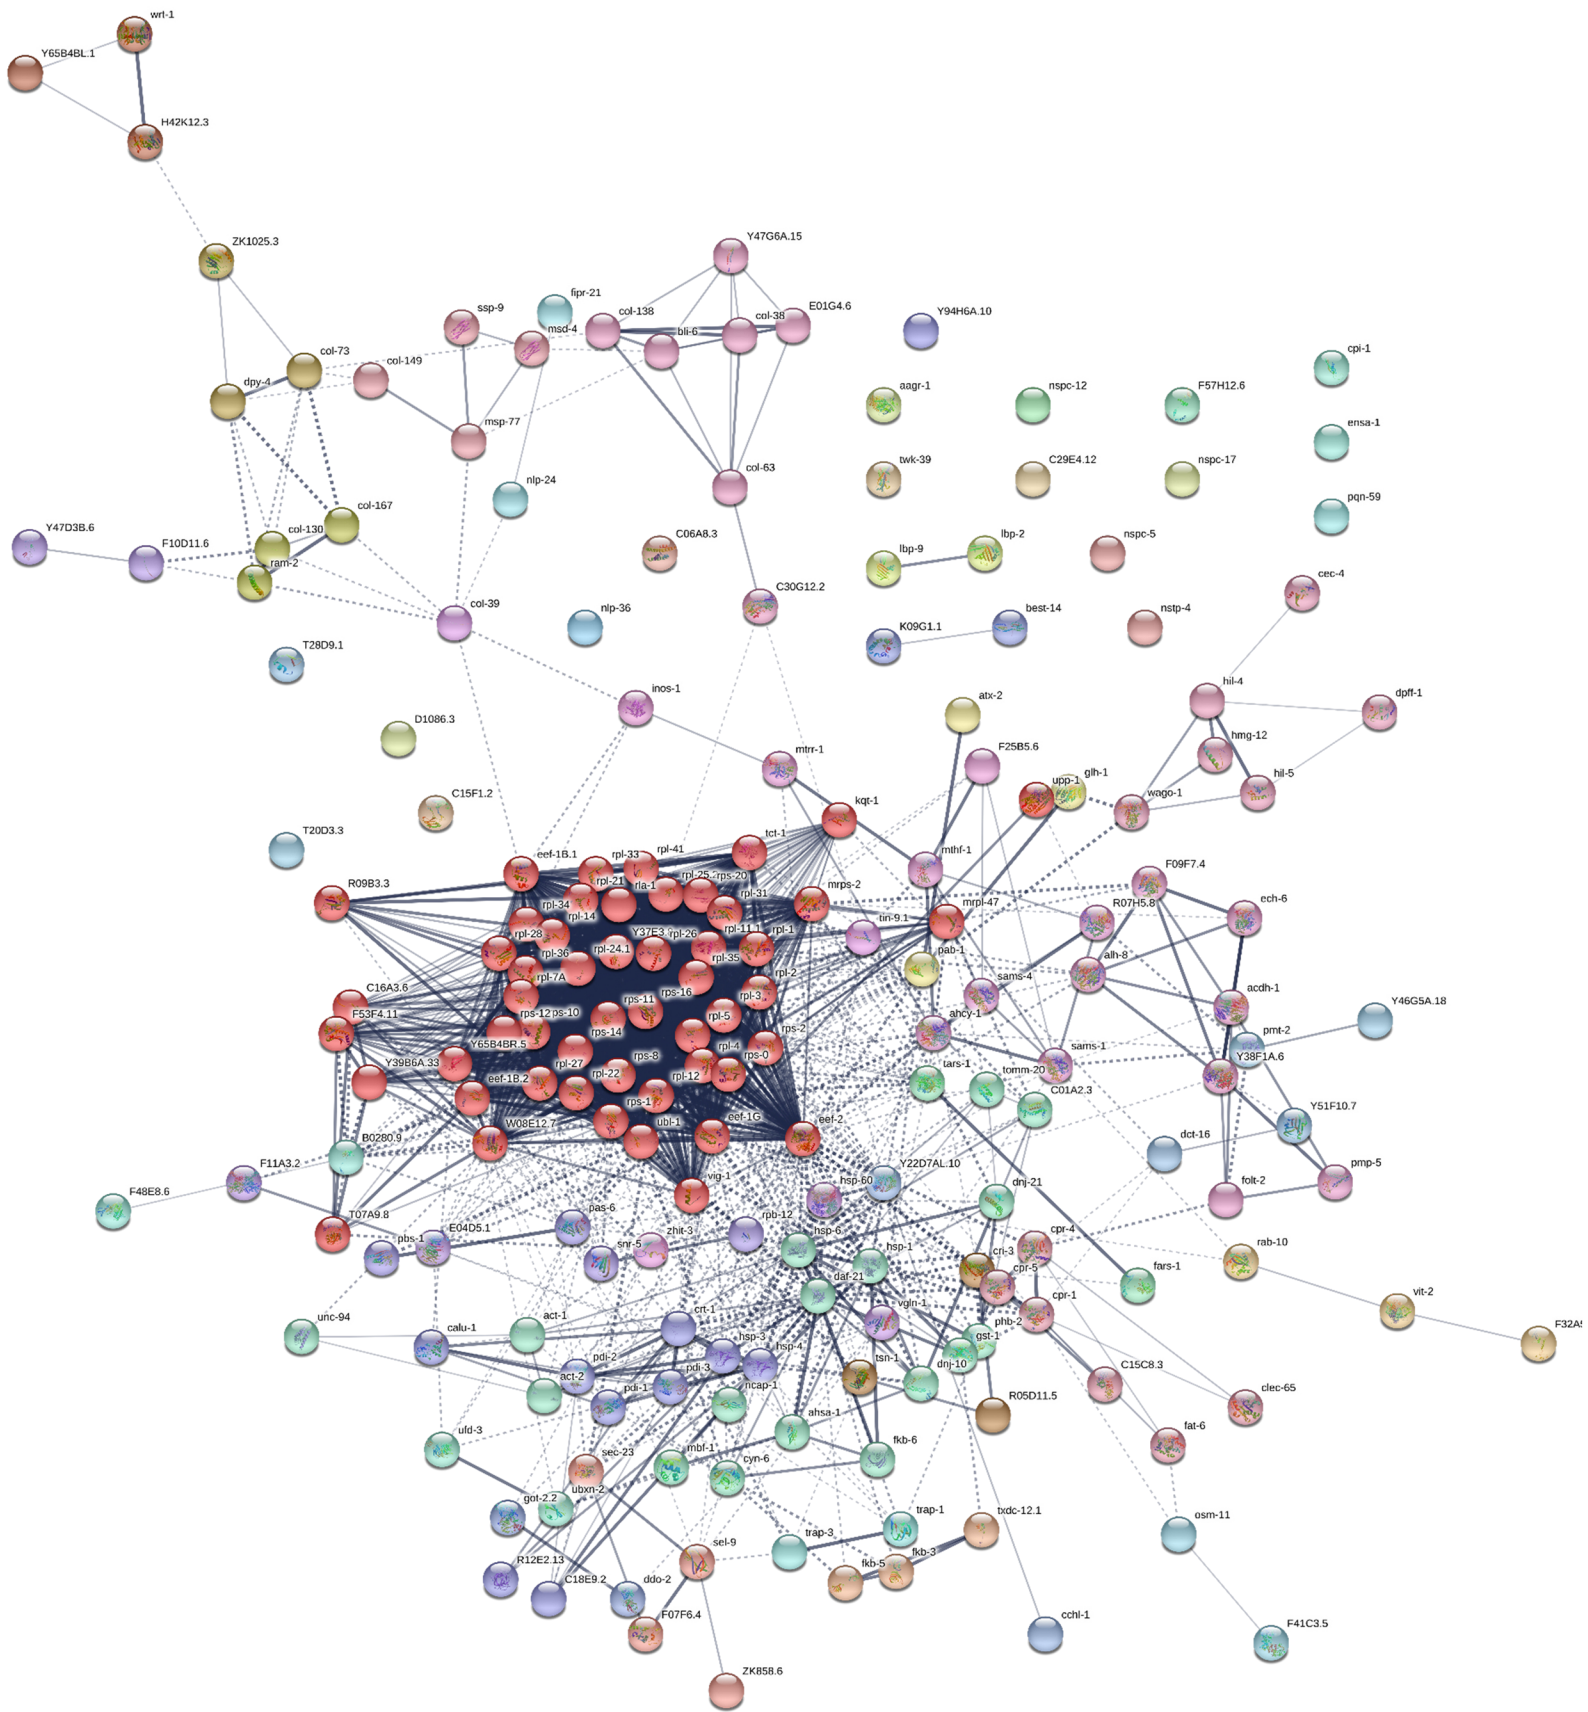

Supplement: NIHMS1642830-supplement-2.pdf [file NIHMS1642830-supplement-2.pdf]
